# Supplementary material for: Regulatory Mechanism of MicroRNA-145 in the Pathogenesis of Acute Aortic Dissection
Source: PubMed Central journal article supplement — Yonsei Med J. 2019 Mar 19;60(4):352–9. doi: 10.3349/ymj.2019.60.4.352 (PMC6433572; doi:10.3349/ymj.2019.60.4.352), 2019-03-19
Supplement: ymj-60-352-s001.pdf [file ymj-60-352-s001.pdf]

**Supplementary Table 1.** Raw Data of the Distribution of miR-145 in Patients

| n  | NAD  | AAD  | n  | NAD  | AAD  |
|----|------|------|----|------|------|
| 1  | 1.19 | 0.29 | 31 | 0.86 | 0.34 |
| 2  | 0.88 | 0.32 | 32 | 0.88 | 0.29 |
| 3  | 1.03 | 0.34 | 33 | 0.94 | 0.26 |
| 4  | 1.00 | 0.42 | 34 | 1.12 | 0.28 |
| 5  | 0.89 | 0.16 | 35 | 0.13 | 0.41 |
| 6  | 0.94 | 0.24 | 36 | 1.24 | 0.45 |
| 7  | 1.02 | 0.19 | 37 | 1.16 | 0.36 |
| 8  | 1.06 | 0.32 | 38 | 0.98 | 0.22 |
| 9  | 0.96 | 0.22 | 39 | 0.75 | 0.35 |
| 10 | 0.94 | 0.18 | 40 | 0.86 | 0.42 |
| 11 | 0.75 | 0.35 | 41 | 1.02 | 0.36 |
| 12 | 0.84 | 0.42 | 42 | 0.86 | 0.33 |
| 13 | 0.75 | 0.26 | 43 | 0.75 | 0.41 |
| 14 | 1.12 | 0.34 | 44 | 0.85 | 0.29 |
| 15 | 1.25 | 0.35 | 45 | 0.89 | 0.32 |
| 16 | 1.13 | 0.29 | 46 | 0.86 | 0.31 |
| 17 | 1.15 | 0.45 | 47 | 1.12 | 0.42 |
| 18 | 0.98 | 0.42 | 48 | 1.02 | 0.19 |
| 19 | 0.96 | 0.24 | 49 | 0.96 | 0.18 |
| 20 | 0.86 | 0.36 | 50 | 0.98 | 0.26 |
| 21 | 0.89 | 0.34 | 51 | 0.75 | 0.25 |
| 22 | 1.03 | 0.21 | 52 | 1.12 | 0.33 |
| 23 | 1.02 | 0.29 | 53 | 1.03 | 0.34 |
| 24 | 1.02 | 0.34 | 54 | 1.14 | 0.35 |
| 25 | 0.81 | 0.41 | 55 | 0.86 | 0.36 |
| 26 | 0.79 | 0.26 | 56 | 0.85 | 0.33 |
| 27 | 0.99 | 0.35 | 57 | 0.96 | 0.41 |
| 28 | 1.19 | 0.22 | 58 | 0.99 | 0.42 |
| 29 | 0.12 | 0.41 | 59 | 0.98 | 0.28 |
| 30 | 0.96 | 0.34 | 60 | 0.86 | 0.29 |

AAD, acute aortic dissection; NAD, normal aortic dissection.
